# Supplementary material
Source: Springer Nature journal article supplement (https://www.springermedizin.de/resource/supplementary/13014_2011_607_MOESM4_ESM.pdf/9634140)
Supplement: MOESM4 [file 9634140]

**Table 2**Association of SNPs with erythema for all patients as well as for the subgroups of patients with breast volume < or >750 cm<sup>3</sup>

| Gene<br>(codon)           | Genotype | all patients<br>(n = 83) |                   |                   |                 |                     |                | patients with breast volume <750 cm <sup>3</sup><br>(n = 48) |                   |                   |                 |                      | patients with breast volume ≥750 cm <sup>3</sup><br>(n = 35) |         |                   |                   |                 |                      |                |
|---------------------------|----------|--------------------------|-------------------|-------------------|-----------------|---------------------|----------------|--------------------------------------------------------------|-------------------|-------------------|-----------------|----------------------|--------------------------------------------------------------|---------|-------------------|-------------------|-----------------|----------------------|----------------|
|                           |          | n (%)                    | G0/1 <sup>a</sup> | G2/3 <sup>a</sup> | OR <sup>b</sup> | 95% CI <sup>c</sup> | P <sup>d</sup> | n (%)                                                        | G0/1 <sup>a</sup> | G2/3 <sup>a</sup> | OR <sup>b</sup> | 95% CI <sup>c</sup>  | P <sup>d</sup>                                               | n (%)   | G0/1 <sup>a</sup> | G2/3 <sup>a</sup> | OR <sup>b</sup> | 95% CI <sup>c</sup>  | P <sup>d</sup> |
| ATM<br>(1853)             | GG       | 63 (76)                  | 28                | 35                | 1               |                     |                | 36 (75)                                                      | 20                | 16                | 1               |                      |                                                              | 27 (77) | 8                 | 19                | 1               | 0.19 – 5.68          |                |
|                           | GA       | 18 (22)                  | 9                 | 9                 | 1.18            | 0.45 – 3.25         | 0.826          | 11 (23)                                                      | 6                 | 5                 | 1.43            | 0.38 – 5.67          | 0.573                                                        | 7 (20)  | 3                 | 4                 | 0.92            | 0.04 – 32.21         | 1.000          |
|                           | AA       | 2 (2)                    | 0                 | 2                 | 1.38            | 0.20 – 10.59        |                | 1 (2)                                                        | 0                 | 1                 | 2.05            | 0.15 – 32.15         |                                                              | 1 (3)   | 0                 | 1                 | 0.84            |                      |                |
| GSTP1<br>(105)            | AA       | 37 (45)                  | 19                | 18                | 1               |                     |                | 21 (44)                                                      | 12                | 9                 | 1               |                      |                                                              | 16 (46) | 7                 | 9                 | 1               |                      |                |
|                           | AG       | 38 (45)                  | 12                | 26                | 1.01            | 0.49 – 2.09         | 1.000          | 21 (44)                                                      | 10                | 11                | 0.98            | 0.39 – 2.44          | 1.000                                                        | 17 (48) | 2                 | 15                | 1.25            | 0.32 – 5.29          | 0.772          |
| TGFB1<br>(pos-509)        | GG       | 8 (10)                   | 6                 | 2                 | 1.02            | 0.24 – 4.35         |                | 6 (12)                                                       | 4                 | 2                 | 0.96            | 0.15 – 5.97          |                                                              | 2 (6)   | 2                 | 0                 | 1.56            | 0.10 – 28.03         |                |
|                           | CC       | 29 (35)                  | 14                | 15                | 1               |                     |                | 18 (38)                                                      | 13                | 5                 | <b>1</b>        |                      |                                                              | 11 (31) | 1                 | 10                | 1               |                      |                |
|                           | CT       | 40 (48)                  | 18                | 22                | 1.26            | 0.65 – 2.50         | 0.530          | 24 (50)                                                      | 12                | 12                | <b>3.10</b>     | <b>1.11 – 10.21</b>  | <b>0.028</b>                                                 | 16 (46) | 6                 | 10                | 0.36            | 0.10 – 1.14          | 0.083          |
| XPD <sup>e</sup><br>(751) | TT       | 14 (17)                  | 5                 | 9                 | 1.59            | 0.42 – 6.24         |                | 6 (12)                                                       | 1                 | 5                 | <b>9.58</b>     | <b>1.23 – 104.30</b> |                                                              | 8 (23)  | 4                 | 4                 | 0.13            | 0.01 – 1.29          |                |
|                           | GG       | 34 (42)                  | 19                | 15                | 1               |                     |                | 20 (43)                                                      | 12                | 8                 | 1               |                      |                                                              | 14 (40) | 7                 | 7                 | <b>1</b>        |                      |                |
| XRCC1<br>(399)            | GT       | 38 (46)                  | 14                | 24                | 1.85            | 0.90 – 4.00         | 0.098          | 20 (43)                                                      | 10                | 10                | 1.42            | 0.59 – 3.59          | 0.420                                                        | 18 (51) | 4                 | 14                | <b>3.95</b>     | <b>0.91 – 22.75</b>  | <b>0.046</b>   |
|                           | TT       | 10 (12)                  | 3                 | 7                 | 3.44            | 0.81 – 16.01        |                | 7 (14)                                                       | 3                 | 4                 | 2.03            | 0.34 – 12.89         |                                                              | 3 (9)   | 0                 | 3                 | <b>15.62</b>    | <b>0.84 – 517.40</b> |                |
|                           | GG       | 36 (43)                  | 17                | 19                | 1               |                     |                | 25 (52)                                                      | 14                | 11                | 1               |                      |                                                              | 11 (31) | 3                 | 8                 | 1               |                      |                |
|                           | GA       | 33 (40)                  | 13                | 20                | 1.02            | 0.54 – 1.93         | 1.000          | 17 (35)                                                      | 9                 | 8                 | 1.13            | 0.46 – 2.76          | 0.840                                                        | 16 (46) | 4                 | 12                | 0.62            | 0.20 – 1.84          | 0.464          |
|                           | AA       | 14 (17)                  | 7                 | 7                 | 1.04            | 0.29 – 3.73         |                | 6 (12)                                                       | 3                 | 3                 | 1.27            | 0.21 – 7.63          |                                                              | 8 (23)  | 4                 | 4                 | 0.39            | 0.04 – 3.39          |                |

<sup>a</sup> Patients with erythema of grade 0 or 1 and grade 2 or 3<sup>b</sup> Odds ratio per allele<sup>c</sup> 95% confidence interval<sup>d</sup> Two-sided p-value from the Cochran-Armitage trend test<sup>e</sup> Failure to genotype one patient
